# Supplementary material for: Effect of a 12-Week Almond-Enriched Diet on Biomarkers of Cognitive Performance, Mood, and Cardiometabolic Health in Older Overweight Adults
Source: PubMed Central journal article supplement (PMC7230374; doi:10.3390/nu12041180), 2020-04-23
Supplement: nutrients-12-01180-s001.pdf [file nutrients-12-01180-s001.pdf]

Supplemental Table S1- number of participants included in the analysis for each variable in the Completers analysis

|                                                              | Almond Diet   |                | Nut-Free Diet |                |
|--------------------------------------------------------------|---------------|----------------|---------------|----------------|
|                                                              | Pre-treatment | Post-treatment | Pre-treatment | Post-treatment |
| <b>Total Completers for analysis (n=128)</b>                 | 63            | 63             | 65            | 65             |
| Attention RT (composite Z-score) <sup>1</sup>                | 59            | 59             | 59            | 62             |
| Attention Accuracy (composite Z-score) <sup>2</sup>          | 62            | 62             | 65            | 65             |
| Working Memory RT (composite Z-score) <sup>3</sup>           | 62            | 62             | 60            | 63             |
| Working Memory Accuracy (composite Z-score) <sup>4</sup>     | 58            | 58             | 65            | 60             |
| Long Term memory Accuracy (composite Z-score) <sup>5</sup>   | 63            | 63             | 65            | 65             |
| Executive Function Accuracy (composite Z-score) <sup>6</sup> | 60            | 60             | 65            | 65             |
| Simple RT (ms)                                               | 60            | 60             | 65            | 63             |
| Choice RT (ms)                                               | 63            | 63             | 63            | 65             |
| Four choice RT- correct responses (%)                        | 63            | 63             | 65            | 65             |
| Four choice RT (ms)                                          | 63            | 63             | 65            | 65             |
| Rapid visual information processing – correct responses (%)  | 63            | 63             | 65            | 65             |
| Rapid visual information processing RT (ms)                  | 62            | 62             | 61            | 63             |
| Rapid visual information processing (false alarms)           | 62            | 62             | 65            | 64             |
| Numeric working memory accuracy (%)                          | 63            | 63             | 65            | 65             |
| Numeric working memory RT (ms)                               | 63            | 63             | 64            | 65             |
| N-Back correct Reponses (%)                                  | 63            | 63             | 65            | 65             |
| N-Back RT (ms)                                               | 63            | 63             | 65            | 65             |
| Corsi Blocks -span (score)                                   | 59            | 59             | 65            | 60             |
| Corsi Blocks RT (ms)                                         | 63            | 63             | 65            | 65             |
| Peg and Ball planning time (before responding) (ms)          | 63            | 63             | 65            | 65             |
| Peg and Ball execution time (ms)                             | 63            | 63             | 64            | 65             |
| Peg and Ball Errors (score)                                  | 63            | 63             | 65            | 65             |
| Immediate Word Recall- correct responses(score)              | 63            | 63             | 64            | 65             |
| Delayed Word Recall- correct responses (score)               | 63            | 63             | 65            | 65             |
| Word Recognition- correct responses (%)                      | 63            | 63             | 65            | 65             |
| Word Recognition RT (ms)                                     | 63            | 63             | 64            | 64             |
| Picture Recognition- correct responses (%)                   | 63            | 63             | 65            | 65             |
| Picture Recognition RT (ms)                                  | 63            | 63             | 65            | 65             |
| Stroop Congruent accuracy (%)                                | 63            | 63             | 65            | 65             |
| Stroop Incongruent accuracy (%)                              | 61            | 61             | 65            | 65             |
| Stroop Congruent RT (ms)                                     | 62            | 62             | 65            | 65             |
| Stroop Incongruent RT (ms)                                   | 62            | 62             | 65            | 65             |

|                                           |    |    |    |    |
|-------------------------------------------|----|----|----|----|
| Serial 3 Total (number of responses)      | 62 | 23 | 65 | 65 |
| Serial 3 accuracy (%)                     | 62 | 62 | 65 | 65 |
| Serial 7 Total (number of responses)      | 62 | 62 | 65 | 65 |
| Serial 7 accuracy (%)                     | 62 | 62 | 65 | 65 |
| <i>Profile of Mood States</i>             |    |    |    |    |
| Total mood disturbance                    | 63 | 63 | 65 | 65 |
| Tension                                   | 63 | 63 | 65 | 65 |
| Depression                                | 63 | 63 | 65 | 65 |
| Anger                                     | 63 | 63 | 65 | 65 |
| Fatigue                                   | 63 | 63 | 65 | 65 |
| Confusion                                 | 63 | 63 | 65 | 65 |
| Vigour                                    | 63 | 63 | 65 | 65 |
| <i>Bond-Lader Visual Analogue Scale</i>   |    |    |    |    |
| Alert                                     | 63 | 63 | 65 | 65 |
| Content                                   | 63 | 63 | 65 | 65 |
| Calm                                      | 63 | 63 | 65 | 65 |
| <i>Karolinska Sleepiness Score</i>        |    |    |    |    |
|                                           | 63 | 63 | 65 | 65 |
| Total cholesterol (mmol/L)                | 61 | 61 | 65 | 62 |
| HDL cholesterol (mmol/L)                  | 61 | 61 | 65 | 62 |
| LDL cholesterol (mmol/L)                  | 61 | 61 | 65 | 62 |
| Triglycerides (mmol/L)                    | 61 | 61 | 65 | 62 |
| Ratio Total chol:HDL                      | 61 | 61 | 65 | 62 |
| Systolic Blood Pressure (mm/Hg)           | 63 | 63 | 65 | 64 |
| Diastolic Blood Pressure (mm/Hg)          | 63 | 63 | 65 | 64 |
| Glucose (mmol/L)                          | 61 | 61 | 65 | 62 |
| Insulin (mU)                              | 62 | 62 | 65 | 62 |
| Small Arterial Compliance (ml/mmHg x 100) | 61 | 61 | 65 | 63 |
| Large Arterial Compliance (ml/mmHg x 10)) | 60 | 60 | 65 | 63 |
| Intracellular Adhesion Molecule (ng)      | 62 | 62 | 65 | 62 |
| Vascular Cell Adhesion Molecule (ng)      | 62 | 62 | 65 | 62 |
| HOMA2-IR                                  | 62 | 62 | 65 | 62 |
| HOMA2-%B                                  | 62 | 62 | 65 | 62 |
| HOMA2-%S                                  | 62 | 62 | 65 | 62 |
| Plasma alpha tocopherol (µg/mL)           | 61 | 62 | 65 | 63 |
| logCRP                                    | 39 | 39 | 38 | 38 |
| Weight (kg)                               | 63 | 63 | 65 | 65 |

|                           |    |    |    |    |
|---------------------------|----|----|----|----|
| BMI (kg/m <sup>2</sup> )  | 63 | 63 | 64 | 65 |
| Waist Circumference (cm)  | 62 | 62 | 65 | 65 |
| Body fat (%)              | 63 | 63 | 65 | 65 |
| Energy (kJ)               | 61 | 61 | 65 | 63 |
| Carbohydrate (g)          | 61 | 61 | 65 | 63 |
| Carbohydrate (%en)        | 61 | 61 | 65 | 63 |
| Sugars (g)                | 61 | 61 | 65 | 63 |
| Protein (g)               | 61 | 61 | 65 | 63 |
| Protein (%en)             | 61 | 61 | 65 | 63 |
| Fat (g)                   | 61 | 61 | 65 | 63 |
| Fat (%en)                 | 61 | 61 | 65 | 63 |
| Monounsaturated fat (g)   | 61 | 61 | 65 | 63 |
| Monounsaturated fat (%en) | 61 | 61 | 65 | 63 |
| Polyunsaturated fat (g)   | 61 | 61 | 65 | 63 |
| Polyunsaturated fat (%en) | 61 | 61 | 65 | 63 |
| Saturated fat (g)         | 61 | 61 | 65 | 63 |
| Saturated fat (%en)       | 61 | 61 | 65 | 63 |
| Alcohol (g)               | 61 | 61 | 65 | 63 |
| Fibre (g)                 | 61 | 61 | 65 | 63 |
| Alpha tocopherol (mg)     | 61 | 61 | 65 | 63 |
| Sodium (mg)               | 61 | 61 | 65 | 63 |
| Potassium (mg)            | 61 | 61 | 65 | 63 |
| Magnesium (mg)            | 61 | 61 | 65 | 63 |
| Calcium (mg)              | 61 | 61 | 65 | 63 |
| Iron (mg)                 | 61 | 61 | 65 | 63 |
| Niacin (mg)               | 61 | 61 | 65 | 63 |
| Niacin Equivalent (mg)    | 61 | 61 | 65 | 63 |
| Riboflavin (mg)           | 61 | 61 | 65 | 63 |
| Energy Expenditure (kJ)   | 61 | 61 | 59 | 62 |

Supplemental Table S2: Effect of treatment on dietary nutrient intake and energy expenditure as determined weighed food diaries and activity diaries. Completers analysis

|                           | Almond Diet   |                | Nut-Free Diet |                | P value | P value | P value    |
|---------------------------|---------------|----------------|---------------|----------------|---------|---------|------------|
|                           | Pre-treatment | Post-treatment | Pre-treatment | Post-treatment | Group   | Time    | Group*Time |
| Energy (kJ)               | 9127 ± 307    | 9630 ± 328     | 8969 ± 302    | 8777 ± 326     | 0.135   | 0.387   | 0.056      |
| Carbohydrate (g)          | 229 ± 8       | 212 ± 8        | 227 ± 8       | 226 ± 8        | 0.564   | 0.079   | 0.137      |
| Carbohydrate (%en)        | 41 ± 5        | 36 ± 5         | 41 ± 5        | 42 ± 5         | 0.001   | 0.001   | <0.0001    |
| Sugars (g)                | 111 ± 58      | 100 ± 58       | 110 ± 58      | 93 ± 58        | 0.510   | <0.0001 | 0.388      |
| Protein (g)               | 94 ± 3        | 99 ± 3         | 94 ± 3        | 88 ± 3         | 0.178   | 0.733   | 0.008      |
| Protein (%en)             | 18 ± 2        | 18 ± 2         | 18 ± 2        | 17 ± 2         | 0.853   | 0.061   | 0.134      |
| Fat (g)                   | 86 ± 6        | 106 ± 6        | 82 ± 6        | 80 ± 6         | <0.0001 | 0.001   | <0.0001    |
| Fat (%en)                 | 35 ± 4        | 41 ± 4         | 34 ± 4        | 34 ± 4         | <0.0001 | <0.0001 | <0.0001    |
| Monounsaturated fat (g)   | 32 ± 1        | 47 ± 1         | 31 ± 1        | 29 ± 1         | <0.0001 | <0.0001 | <0.0001    |
| Monounsaturated fat (%en) | 13 ± 2        | 19 ± 2         | 13 ± 2        | 12 ± 2         | <0.0001 | <0.0001 | <0.0001    |
| Polyunsaturated fat (g)   | 13 ± 5        | 19 ± 5         | 12 ± 5        | 10 ± 5         | <0.0001 | <0.0001 | <0.0001    |
| Polyunsaturated fat (%en) | 5 ± 0.3       | 7 ± 0.3        | 5 ± 0.3       | 4 ± 0.3        | <0.0001 | <0.0001 | <0.0001    |
| Saturated fat (g)         | 34 ± 1        | 31 ± 1         | 32 ± 1        | 34 ± 1         | 0.797   | 0.710   | 0.065      |
| Saturated fat (%en)       | 14 ± 0        | 12 ± 0         | 13 ± 0        | 14 ± 0         | 0.027   | 0.422   | <0.0001    |
| Alcohol (g)               | 8 ± 3         | 8 ± 4          | 10 ± 3        | 11 ± 4         | 0.253   | 0.610   | 0.407      |
| Fibre (g)                 | 28 ± 1        | 29 ± 1         | 27 ± 1        | 24 ± 1         | 0.019   | 0.447   | 0.003      |
| Alpha tocopherol (mg)     | 12 ± 2        | 26 ± 2         | 11 ± 2        | 10 ± 2         | <0.0001 | <0.000  | <0.0001    |
| Sodium (mg)               | 2468 ± 1928   | 2401 ± 1929    | 2497 ± 1927   | 2687 ± 1929    | 0.283   | 0.608   | 0.281      |
| Potassium (mg)            | 3498 ± 118    | 3618 ± 117     | 3417 ± 115    | 3193 ± 116     | 0.130   | 0.316   | 0.009      |
| Magnesium (mg)            | 402 ± 26      | 491 ± 25       | 388 ± 25      | 329 ± 25       | <0.0001 | 0.102   | <0.0001    |
| Calcium (mg)              | 1082 ± 155    | 1103 ± 153     | 1025 ± 154    | 914 ± 153      | 0.056   | 0.167   | 0.043      |
| Iron (mg)                 | 12 ± 5        | 14 ± 5         | 13 ± 5        | 11 ± 5         | 0.279   | 0.605   | <0.0001    |
| Niacin (mg)               | 24 ± 11       | 25 ± 11        | 25 ± 11       | 23 ± 11        | 0.602   | 0.444   | 0.345      |
| Niacin Equivalents (mg)   | 43 ± 4        | 44 ± 4         | 42 ± 4        | 40 ± 4         | 0.275   | 0.570   | 0.093      |
| Riboflavin (mg)           | 2.2 ± 0.6     | 2.9 ± 0.6      | 2.3 ± 0.6     | 2.0 ± 0.6      | 0.004   | 0.026   | <0.0001    |
| Caffeine (mg)             | 229 ± 117     | 211 ± 116      | 205 ± 116     | 196 ± 116      | 0.334   | 0.310   | 0.757      |
| Energy Expenditure (kJ)   | 14333 ± 281   | 14408 ± 271    | 14611 ± 279   | 14211 ± 270    | 0.632   | 0.832   | 0.217      |

Estimated Marginal Means ± SEM presented from Linear Mixed Model, at baseline (pre-treatment) and 12weeks (post-treatment). Statistical significance p<0.05.

Supplemental Table S3: Effect of Treatment on cognition. Completers analysis

|                                                              | Almond Diet       |                    | Nut-Free Diet     |                    | Group<br>( <i>p</i> ) | Time<br>( <i>p</i> ) | Group x Time<br>Interaction ( <i>p</i> ) |
|--------------------------------------------------------------|-------------------|--------------------|-------------------|--------------------|-----------------------|----------------------|------------------------------------------|
|                                                              | Pre-<br>treatment | Post-<br>treatment | Pre-<br>treatment | Post-<br>treatment |                       |                      |                                          |
| Attention RT (composite Z-score) <sup>1</sup>                | 0.007 ± 0.084     | 0.003 ± 0.080      | -0.001 ± 0.084    | -0.079 ± 0.079     | 0.673                 | 0.373                | 0.419                                    |
| Attention Accuracy (composite Z-score) <sup>2</sup>          | -0.084 ± 0.072    | -0.039 ± 0.074     | 0.075 ± 0.070     | 0.044 ± 0.073      | 0.213                 | 0.841                | 0.255                                    |
| Working Memory RT (composite Z-score) <sup>3</sup>           | 0.046 ± 0.069     | -0.019 ± 0.071     | 0.020 ± 0.070     | -0.069 ± 0.070     | 0.667                 | 0.092                | 0.804                                    |
| Working Memory Accuracy (composite Z-score) <sup>4</sup>     | -0.119 ± 0.082    | -0.062 ± 0.089     | 0.114 ± 0.079     | 0.080 ± 0.087      | 0.108                 | 0.692                | 0.131                                    |
| Long Term memory Accuracy (composite Z-score) <sup>5</sup>   | -0.056 ± 0.63     | 0.010 ± 0.074      | -0.056 ± 0.063    | 0.115 ± 0.073      | 0.444                 | 0.002                | 0.368                                    |
| Executive Function Accuracy (composite Z-score) <sup>6</sup> | -0.154 ± 0.073    | -0.079 ± 0.078     | 0.080 ± 0.071     | 0.125 ± 0.077      | 0.030                 | 0.084                | 0.660                                    |
| Simple RT (ms)                                               | 348 ± 13          | 350 ± 12           | 351 ± 13          | 345 ± 12           | 0.938                 | 0.859                | 0.658                                    |
| Choice RT -correct responses (%)                             | 94.84 ± 0.76      | 94.85 ± 0.58       | 94.55 ± 0.74      | 94.82 ± 0.57       | 0.838                 | 0.782                | 0.798                                    |
| Choice RT (ms)                                               | 489 ± 11          | 502 ± 11           | 498 ± 11          | 486 ± 11           | 0.794                 | 0.970                | 0.129                                    |
| Four choice RT- correct responses (%)                        | 99.67 ± 0.10      | 99.73 ± 0.13       | 99.71 ± 0.10      | 99.49 ± 0.13       | 0.462                 | 0.403                | 0.126                                    |
| Four choice RT (ms)                                          | 691 ± 16          | 682 ± 17           | 709 ± 16          | 675 ± 16           | 0.812                 | 0.008                | 0.132                                    |
| Rapid visual information processing -correct responses (%)   | 32.9 ± 2.5        | 36.2 ± 2.7         | 35.6 ± 2.5        | 38.6 ± 2.7         | 0.463                 | 0.018                | 0.915                                    |
| Rapid visual information processing RT (ms)                  | 540 ± 9           | 537 ± 8            | 537 ± 9           | 539 ± 8            | 0.967                 | 0.951                | 0.666                                    |
| Rapid visual information processing (false alarms)           | 9.9 ± 1.9         | 11.7 ± 1.9         | 11.9 ± 1.8        | 12.3 ± 1.8         | 0.622                 | 0.148                | 0.386                                    |
| Numeric working memory accuracy (%)                          | 89.41 ± 1.20      | 89.88 ± 1.21       | 91.60 ± 1.18      | 92.65 ± 1.19       | 0.095                 | 0.360                | 0.819                                    |
| Numeric working memory RT (ms)                               | 1303 ± 43         | 1292 ± 42          | 1241 ± 42         | 1180 ± 41          | 0.127                 | 0.048                | 0.172                                    |
| N-Back correct Responses (%)                                 | 74.17 ± 2.56      | 73.99 ± 2.88       | 75.71 ± 2.52      | 74.59 ± 2.84       | 0.749                 | 0.732                | 0.804                                    |
| N-Back RT (ms)                                               | 870 ± 35          | 892 ± 39           | 916 ± 34          | 888 ± 38           | 0.632                 | 0.898                | 0.352                                    |
| Corsi Blocks -span (score)                                   | 5.13 ± 0.10       | 5.19 ± 0.12        | 5.32 ± 0.10       | 5.08 ± 0.12        | 0.770                 | 0.333                | 0.095                                    |
| Corsi Blocks RT (ms)                                         | 8461 ± 322        | 7781 ± 297         | 8780 ± 369        | 8304 ± 293         | 0.297                 | 0.025                | 0.689                                    |
| Peg and Ball planning time (before responding) (ms)          | 6435 ± 322        | 6057 ± 292         | 6007 ± 317        | 5670 ± 288         | 0.364                 | 0.018                | 0.886                                    |
| Peg and Ball execution time (ms)                             | 16872 ± 671       | 15908 ± 580        | 16094 ± 662       | 14706 ± 571        | 0.242                 | 0.000                | 0.632                                    |
| Peg and Ball Errors (score)                                  | 4.57 ± 0.47       | 4.00 ± 0.48        | 4.16 ± 0.46       | 3.18 ± 0.47        | 0.231                 | 0.069                | 0.632                                    |
| Immediate Word Recall- correct responses(score)              | 5.33 ± 0.25       | 5.60 ± 0.25        | 5.72 ± 0.24       | 6.47 ± 0.24        | 0.040                 | 0.004                | 0.159                                    |
| Delayed Word Recall- correct responses (score)               | 3.58 ± 0.25       | 4.01 ± 0.27        | 3.98 ± 0.25       | 4.36 ± 0.26        | 0.236                 | 0.023                | 0.880                                    |
| Word Recognition- correct responses (%)                      | 80.05 ± 1.18      | 81.61 ± 1.12       | 78.02 ± 1.17      | 81.69 ± 1.10       | 0.479                 | 0.003                | 0.240                                    |
| Word Recognition RT (ms)                                     | 1251 ± 40         | 1268 ± 43          | 1315 ± 39         | 1338 ± 42          | 0.201                 | 0.441                | 0.913                                    |
| Picture Recognition- correct responses (%)                   | 97.25 ± 0.45      | 96.63 ± 0.50       | 96.43 ± 0.044     | 96.73 ± 0.49       | 0.533                 | 0.633                | 0.177                                    |
| Picture Recognition RT (ms)                                  | 948 ± 28          | 940 ± 27           | 996 ± 28          | 988 ± 27           | 0.197                 | 0.528                | 0.998                                    |
| Stroop Congruent accuracy (%)                                | 99.08 ± 0.33      | 99.02 ± 0.29       | 99.23 ± 0.32      | 98.82 ± 0.28       | 0.927                 | 0.389                | 0.525                                    |
| Stroop Incongruent accuracy (%)                              | 94.75 ± 0.98      | 95.09 ± 0.94       | 97.14 ± 0.96      | 97.75 ± 0.93       | 0.043                 | 0.391                | 0.814                                    |
| Stroop Congruent RT (ms)                                     | 1168 ± 41         | 1118 ± 38          | 1130 ± 40         | 1084 ± 37          | 0.470                 | 0.062                | 0.937                                    |
| Stroop Incongruent RT (ms)                                   | 1244 ± 46         | 1259 ± 43          | 1262 ± 45         | 1230 ± 42          | 0.923                 | 0.704                | 0.296                                    |

|                                |            |            |            |            |       |       |       |
|--------------------------------|------------|------------|------------|------------|-------|-------|-------|
| Serial 3 (number of responses) | 20.5 ± 1.3 | 20.3 ± 1.4 | 24.1 ± 1.3 | 24.1 ± 1.3 | 0.047 | 0.781 | 0.815 |
| Serial 3 accuracy (%)          | 18.3 ± 1.4 | 17.8 ± 1.4 | 21.8 ± 1.4 | 21.1 ± 1.4 | 0.077 | 0.225 | 0.899 |
| Serial 7 (number of responses) | 14.7 ± 1.2 | 15.3 ± 1.2 | 18.7 ± 1.1 | 18.4 ± 1.2 | 0.032 | 0.687 | 0.323 |
| Serial 7 accuracy (%)          | 11.5 ± 1.2 | 12.1 ± 1.3 | 15.7 ± 1.2 | 15.2 ± 1.2 | 0.030 | 0.935 | 0.266 |

Estimated Marginal Means ± SEM presented from Linear Mixed Model (including age, gender and BMI as covariates), at baseline (pre-treatment) and 12weeks (post-treatment). Statistical significance p<0.05. RT=reaction time, ms=milliseconds.

<sup>1</sup>Composite score for Attention -Reaction Time (RT) = (zSimple RT + zChoice RT + zFour Choice RT + zRapid Visual Information Processing)/4

<sup>2</sup>Composite score for Attention -Accuracy= (zChoice RT + zFour Choice RT + zRapid Visual Information Processing + zSerial subtraction 3 + zSerial subtraction 7)/5

<sup>3</sup>Composite score for Working Memory -RT= (zNumeric Working Memory + zN-back + zCorsi blocks + zRapid Visual Information Processing)/4

<sup>4</sup>Composite score for Working Memory -Accuracy= (zNumeric Working Memory + zN-back + zCorsi blocks + zSerial subtraction 3 + zSerial subtraction 7 + zRapid Visual Information Processing)/6

<sup>5</sup>Composite score for Long Term Memory= (zDelayed Word Recall + zDelayed Word Recognition + zDelayed Picture Recognition + zVerbal Fluency + zVerbal Fluency Exclusion)/5

<sup>6</sup>Composite score for Executive Function= (zStroop Congruent correct + zStroop Incongruent correct + zVerbal Fluency + zVerbal Fluency Exclusion + zSerial subtraction 3 + zSerial subtraction 7 + zPeg and Ball (accuracy=negatively scored errors))/7

Supplemental Table S4: Effect of Treatment on mood. Completers analysis

|                                         | Almond Diet   |                | Nut-Free Diet |                | Group ( <i>p</i> ) | Time ( <i>p</i> ) | Group x Time Interaction ( <i>p</i> ) |
|-----------------------------------------|---------------|----------------|---------------|----------------|--------------------|-------------------|---------------------------------------|
|                                         | Pre-treatment | Post-treatment | Pre-treatment | Post-treatment |                    |                   |                                       |
| <i>Profile of Mood States</i>           |               |                |               |                |                    |                   |                                       |
| Total mood disturbance                  | 1.36 ± 2.01   | 1.42 ± 2.24    | -3.62 ± 2.0   | -2.12 ± 2.2    | 0.106              | 0.591             | 0.606                                 |
| Tension                                 | 4.87 ± 0.57   | 4.37 ± 0.44    | 4.08 ± 0.57   | 3.62 ± 0.43    | 0.219              | 0.192             | 0.958                                 |
| Depression                              | 2.22 ± 0.43   | 2.50 ± 0.51    | 1.15 ± 0.43   | 1.42 ± 0.50    | 0.052              | 0.463             | 0.983                                 |
| Anger                                   | 1.52 ± 0.37   | 1.04 ± 0.34    | 1.08 ± 0.37   | 1.03 ± 0.33    | 0.573              | 0.390             | 0.477                                 |
| Fatigue                                 | 4.33 ± 0.43   | 4.85 ± 0.57    | 3.38 ± 0.43   | 3.73 ± 0.56    | 0.086              | 0.259             | 0.820                                 |
| Confusion                               | 5.35 ± 0.43   | 5.18 ± 0.43    | 4.43 ± 0.43   | 4.19 ± 0.42    | 0.078              | 0.448             | 0.912                                 |
| Vigour                                  | 16.90 ± 0.75  | 16.53 ± 0.79   | 17.77 ± 0.74  | 16.11 ± 0.78   | 0.818              | 0.033             | 0.174                                 |
| <i>Bond-Lader Visual Analogue Scale</i> |               |                |               |                |                    |                   |                                       |
| Alert                                   | 55.12 ± 2.00  | 50.08 ± 2.04   | 61.35 ± 1.96  | 60.93 ± 2.00   | 0.122              | 0.118             | 0.053                                 |
| Content                                 | 67.22 ± 1.88  | 70.08 ± 2.06   | 71.99 ± 1.86  | 71.84 ± 2.03   | 0.201              | 0.228             | 0.181                                 |
| Calm                                    | 50.20 ± 2.33  | 54.28 ± 2.17   | 53.34 ± 2.31  | 56.69 ± 2.13   | 0.326              | 0.011             | 0.800                                 |
| <i>Karolinska Sleepiness Score</i>      | 4.15 ± 0.19   | 4.20 ± 0.20    | 4.08 ± 0.13   | 4.16 ± 0.19    | 0.808              | 0.561             | 0.879                                 |

Estimated Marginal Means ± SEM presented from Linear Mixed Model\*, at baseline (pre-treatment) and 12weeks (post-treatment). Statistical significance  $p < 0.05$

\* Statistical model for Profile of Mood States variables included age, gender, body mass index (BMI) and Bond-Lader Alertness as covariates.

\* Statistical model for Bond-Lader variables included age, gender, BMI and Karolinska Sleepiness score as covariates.

\* Statistical model for Karolinska Sleepiness Score included age, gender and BMI

Supplemental Table S5: Effect of Treatment on Cardiometabolic Parameters. Completers analysis

|                                           | Almond Diet   |                | Nut-Free Diet |                | Group ( <i>p</i> ) | Time ( <i>p</i> ) | Group x Time Interaction ( <i>p</i> ) |
|-------------------------------------------|---------------|----------------|---------------|----------------|--------------------|-------------------|---------------------------------------|
|                                           | Pre-treatment | Post-treatment | Pre-treatment | Post-treatment |                    |                   |                                       |
| Total cholesterol (mmol/L)                | 5.12 ± 0.13   | 4.92 ± 0.12    | 5.25 ± 0.13   | 5.21 ± 0.11    | 0.199              | 0.032             | 0.154                                 |
| HDL cholesterol (mmol/L)                  | 1.43 ± 0.05   | 1.45 ± 0.05    | 1.47 ± 0.05   | 1.49 ± 0.05    | 0.558              | 0.344             | 0.985                                 |
| LDL cholesterol (mmol/L)                  | 3.08 ± 0.12   | 2.94 ± 0.11    | 3.27 ± 0.12   | 3.19 ± 0.10    | 0.153              | 0.031             | 0.502                                 |
| Triglycerides (mmol/L)                    | 1.30 ± 0.07   | 1.16 ± 0.06    | 1.13 ± 0.06   | 1.16 ± 0.06    | 0.282              | 0.090             | 0.004                                 |
| Ratio Total chol:HDL                      | 3.87 ± 0.14   | 3.58 ± 0.12    | 3.72 ± 0.14   | 3.62 ± 0.12    | 0.764              | <0.0001           | 0.074                                 |
| Systolic Blood Pressure (mm/Hg)           | 133 ± 2       | 128 ± 2        | 133 ± 2       | 132 ± 2        | 0.403              | 0.001             | 0.052                                 |
| Diastolic Blood Pressure (mm/Hg)          | 76 ± 1        | 75 ± 1         | 76 ± 1        | 76 ± 1         | 0.653              | 0.017             | 0.177                                 |
| Glucose (mmol/L)                          | 5.6 ± 0.1     | 5.6 ± 0.1      | 5.6 ± 0.1     | 5.5 ± 0.1      | 0.665              | 0.294             | 0.395                                 |
| Insulin (mU)                              | 6.98 ± 0.50   | 7.27 ± 0.49    | 7.37 ± 0.49   | 7.06 ± 0.48    | 0.889              | 0.959             | 0.206                                 |
| Small Arterial Compliance (ml/mmHg x 100) | 5.0 ± 0.4     | 5.2 ± 0.4      | 5.0 ± 0.3     | 5.3 ± 0.4      | 0.856              | 0.304             | 0.825                                 |
| Large Arterial Compliance (ml/mmHg x 10)  | 15.1 ± 0.5    | 16.2 ± 0.5     | 16.2 ± 0.5    | 16.4 ± 0.5     | 0.311              | 0.063             | 0.214                                 |
| Intracellular Adhesion Molecule (ng)      | 168 ± 11      | 184 ± 20       | 168 ± 11      | 152 ± 19       | 0.406              | 0.993             | 0.162                                 |
| Vascular Cell Adhesion Molecule (ng)      | 1123 ± 29     | 1148 ± 32      | 1056 ± 29     | 1050 ± 31      | 0.045              | 0.993             | 0.162                                 |
| HOMA2-IR                                  | 0.94 ± 0.07   | 0.98 ± 0.07    | 0.98 ± 0.07   | 0.94 ± 0.06    | 0.954              | 0.920             | 0.192                                 |
| HOMA2-%B                                  | 70.2 ± 3.9    | 71.6 ± 3.2     | 71.4 ± 3.3    | 71.2 ± 3.1     | 0.928              | 0.714             | 0.632                                 |
| HOMA2-%S                                  | 137.5 ± 9.7   | 134.8 ± 8.4    | 141.5 ± 9.5   | 138.2 ± 8.2    | 0.753              | 0.570             | 0.957                                 |
| Alpha tocopherol (µg/mL)                  | 4.85 ± 0.26   | 4.86 ± 0.21    | 4.69 ± 0.25   | 4.53 ± 0.21    | 0.435              | 0.526             | 0.481                                 |
| logCRP                                    | 0.327 ± 0.054 | 0.346 ± 0.058  | 0.359 ± 0.053 | 0.304 ± 0.057  | 0.941              | 0.588             | 0.260                                 |
| Weight (kg) *                             | 84.09 ± 1.48  | 84.38 ± 1.46   | 84.22 ± 1.45  | 84.16 ± 1.44   | 0.983              | 0.370             | 0.151                                 |
| BMI (kg/m <sup>2</sup> ) *                | 30.24 ± 0.45  | 30.36 ± 0.45   | 30.78 ± 0.45  | 30.36 ± 0.45   | 0.922              | 0.284             | 0.127                                 |
| Waist Circumference (cm) *                | 100.9 ± 1.2   | 101.1 ± 1.2    | 101.6 ± 1.2   | 101.4 ± 1.1    | 0.754              | 0.818             | 0.331                                 |
| Body fat (%) *                            | 35.7 ± 0.7    | 35.7 ± 0.7     | 35.4 ± 0.7    | 35.3 ± 0.7     | 0.683              | 0.507             | 0.850                                 |

Estimated Marginal Means ± SEM presented from Linear Mixed Model (including age, gender and BMI as covariates (\*statistical model does not include BMI as covariate)), at baseline (pre-treatment) and 12weeks (post-treatment). Statistical significance  $p < 0.05$ . CRP was logged transformed to account for non-normally distributed data.
